# Supplementary material for: Interplay between Alternative Splicing and Alternative Polyadenylation Defines the Expression Outcome of the Plant Unique OXIDATIVE TOLERANT-6 Gene
Source: PubMed Central journal article supplement (PMC5435732; doi:10.1038/s41598-017-02215-z), 2017-05-17
Supplement: 41598_2017_2215_MOESM1_ESM.pdf [file 41598_2017_2215_MOESM1_ESM.pdf]

## Supplementary Information

Interplay between Alternative Splicing and Alternative Polyadenylation Defines the Expression Outcome of the *OXIDATIVE TOLERANT-6* Gene,

Qingshun Q. Li, Zhaoyang Liu, Wenjia Lu and Man Liu

### S1 Table. List of primers used in this study

#### 3' RACE primers

| Oligo name               | Sequence (5' to 3')                            |
|--------------------------|------------------------------------------------|
| Oligo d(T) with Adaptor  | TTCTAGAATTCAGCATTTCGCTTCTTT<br>TTTTTTTTTTTTTTT |
| Oligo d(T) Adaptor       | TTCTAGAATTCAGCATTTCGCTTC                       |
| <i>AtCPSF30</i> 3'RACE-1 | CTGGACCTCCACCACCAGTTGA                         |
| <i>AtCPSF30</i> 3'RACE-2 | CCACAGCTACAAGATAGACCTCA                        |
| <i>AtC30Y</i> 3'RACE-1   | AGGATGCATCACATGACATGGA                         |
| <i>AtC30Y</i> 3'RACE-2   | GAAGAGAGTGAAAGTGAAGAC                          |

#### Mutagenesis primers

| Oligo name           | Sequence (5' to 3')                                         |
|----------------------|-------------------------------------------------------------|
| <i>OXT6</i> pA1      | GTTGTTATTGGTTCAGTGGCGCCATATTGGTTTCTTATA                     |
| <i>OXT6</i> pA1-comp | GCTCTTATAAGAAACCAATATGGCACTGAACCA                           |
| <i>OXT6</i> pA2      | GAATGTAAGTGGTATTTGCAAGTTCAGTATCTACCTGA<br>TTTTAGGATAATTTTC  |
| <i>OXT6</i> pA2-comp | GAAAATTATCCTAAAATCAGGTAGATACTGAACTTGCA<br>AATAACCAGTTACATTC |
| <i>OXT6</i> 5'ss     | GCCTCAAGGGGTAAATAGATGCGTTCAGAGTCCTAAGG<br>T                 |

|                       |                                                                                   |
|-----------------------|-----------------------------------------------------------------------------------|
| <i>OXT6</i> 5'ss-comp | ACCTTAGGACTCTGAACGCATCTATTTACCCCTTGAGG<br>C                                       |
| <i>OXT6</i> 3'ss      | CTCTTCATAGGTAATCCCTTACATAATTTAGGATCTTGTT<br>TTGATATCGTATTTTGTAGTTAAAAGTAACAATCGAG |
| <i>OXT6</i> 3'ss-comp | CTCGATTGTTACTTTTAACTACAAAATACGATATCAAAAC<br>AAGATCCTAAATTATGTAAGGGATTACCTATGAAGAG |
| <i>OXT6</i> pA3       | AGCGGCAGGTTGTTGGTGGTCTATGGCATTAG                                                  |
| <i>OXT6</i> pA3-comp  | CTAATGCCATAGACCACCAACAACCTGCCGCT                                                  |

### Real-time RT-PCR primers

| Oligo name                                | Sequence (5' to 3')       |
|-------------------------------------------|---------------------------|
| <i>Tlp41</i> -F (Internal Reference)      | GTGAAAACCTGTTGGAGAGAAGCAA |
| <i>Tlp41</i> -R (Internal Reference)      | TCAACTGGATACCCTTTTCGCA    |
| <i>AtCPSF30</i> and <i>AtC30Y</i> -qPCR-F | CCGCCTGAAAACCTCTTCCT      |
| <i>AtCPSF30</i> -qPCR-R                   | TGAACCAATAACAACGTCTTGA    |
| <i>AtC30Y</i> -qPCR-R                     | AGCTTCATTGCTCCTTTGTG      |
